# Supplementary material
Source: PubMed Central journal article supplement (PMC4686195)

1 **Supplementary material**

2

3 **Table S1.** Number of MS hits detected for 777 proteins, divided between four protein fractions: AP-  
4 soluble, AP-membrane, HI-soluble and HI-membrane.

5

6 **Table S2.** Known or predicted (KOP), and putative novel c-di-GMP binding proteins in *Bdellovibrio*  
7 *bacteriovorus* HD100 as they were detected by CCMS. Data is provided as “the number of MS hits  
8 detected in a binding experiment / the number of hits detected in a competition control”. For details see  
9 materials and methods. A. KOP c-di-GMP binding proteins include all previously identified c-di-GMP  
10 network proteins in *B. bacteriovorus* and c-di-GMP orthologous binders in other bacteria. B. Putative  
11 novel binders are proteins hitherto not known to bind c-di-GMP.

12

13 **Table S3.** Functional classification of the 84 CCMS candidate binders.

14

15 **Figure S1.** Pairwise sequence alignment of *Xanthomonas campestris* Clp (Clp\_XCC0472) and *B.*  
16 *bacteriovorus* HD00 CRP (Bd2590). D70, R154, R166 and D170 are involved in c-di-GMP binding by Clp  
17 (11). Bd2590 retains 3 of the four positions. E99 is responsible for Clp DNA-binding. The HTH motif is  
18 colored in blue.

19

20 **Figure S2.** Protein affinity purification. Bd2717 (A), Bd2402 (B) and Bd2924 (C) were His-tagged, produced  
21 and purified with Ni-NTA resin. Tot. – total protein lysate, F.T. – flow through unbound fraction, W. -  
22 wash, M. size marker, Elution – Elution fraction, Dial. – post dialysis.

23

24 **Figure S3.** Bd2717 binds two cyclic di-GMP molecules. The arginine residue, positioned adjacent to the  
25 RxxxR motif (R<sup>155</sup>RXXXR) in the PilZ protein Bd2717, is predicted to promote binding of an intercalated c-  
26 di-GMP dimer rather than a c-di-GMP monomer (32). Microscale thermophoresis measurements carried

27 with saturating concentrations of c-di-GMP, resulting in saturation curve that shows a characteristic kink,  
 28 when saturation is reached. Bd2717 bound 1.7 cyclic di-GMP molecules, *i.e.* two c-di-GMP molecules.

29

30 **Figure S4.** Bd2402 and Bd2924 do not interact with cyclic di-AMP. Fluorescently labeled (A) Bd2402, a  
 31 two-component response regulator, and (B) Bd2924, an acyl-coA dehydrogenase, were subjected to MST  
 32 analysis with increasing concentrations of cyclic di-AMP, which had no apparent effect on the  
 33 thermophoretic movement of the two proteins. Average values are of three triplicates. Error bars indicate  
 34 standard deviation.

35

36

37 **Figure S1**

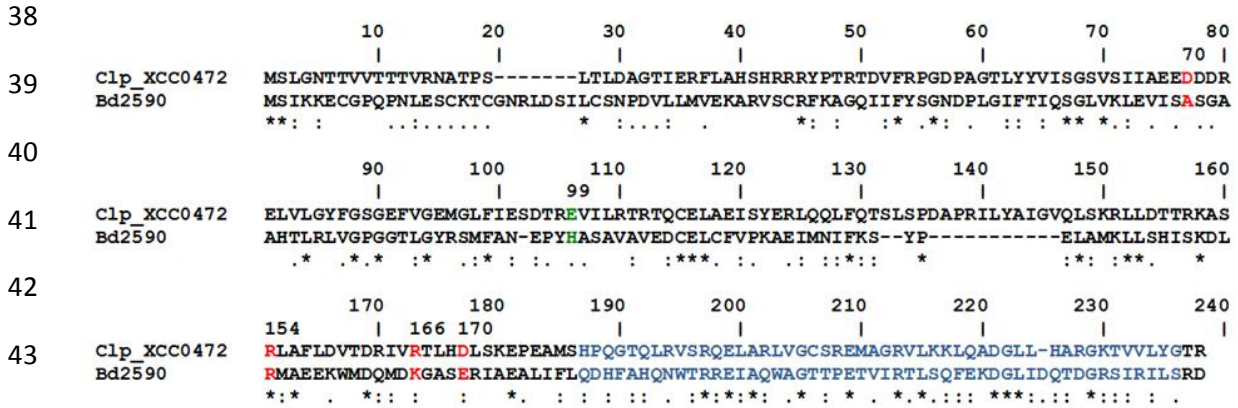

53 **Figure S2**

54

55

56

57

58

59

60

61

62

63

64

65

66

67 **Figure S3**

68

69

70

71

72

73

74

75

76

77

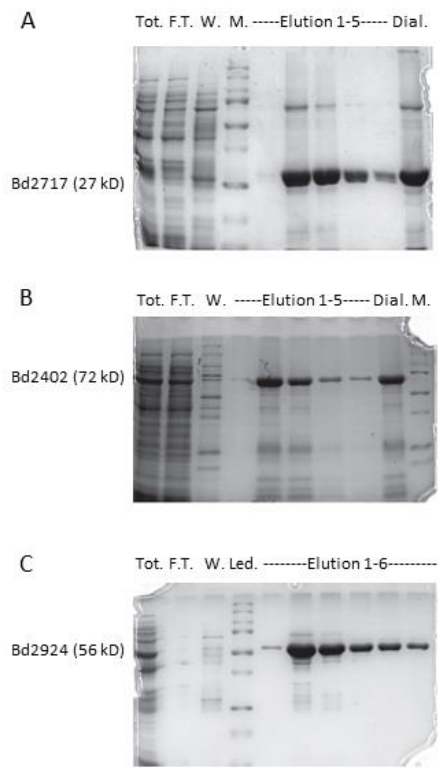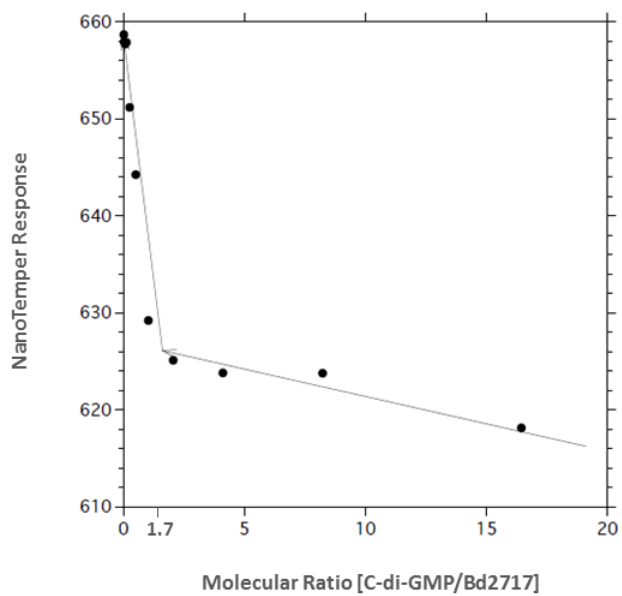

78 **Figure S4**

79

80

81

82

83

84

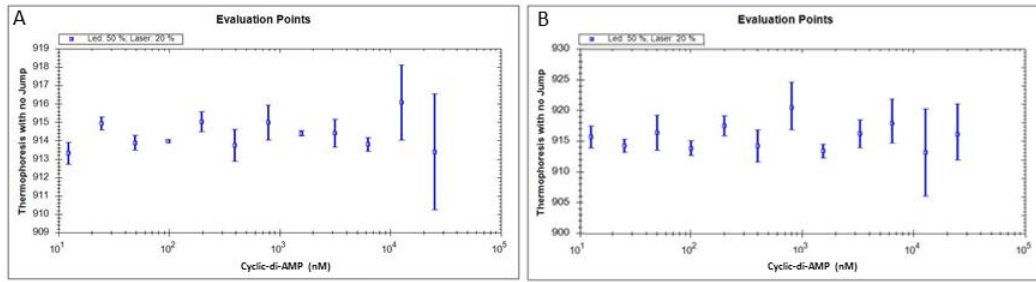

Supplement: JB.00422-15_zjb999093804so4.pdf [file JB.00422-15_zjb999093804so4.pdf]
